# Supplementary material for: A cowpea severe mosaic virus-based vector bolsters virus-induced gene silencing and foreign protein expression in soybean
Source: Research Square preprint supplement (doi:10.21203/rs.3.rs-1463088/v1), 2022-03-22
Supplement: Supplementary file 1 [file 2a0303a6f06fd2791e235dff.docx]

**Supplementary Table 2**. Sequences of gBlock fragments used in this study.

Letters in red: introns; underlined: restriction enzyme (RE) sites used for inserting the gBlock fragments into CPSMV RNA1 or 2 cDNA.

| **Name (bp)** | **Sequence** | **RE sites** |
| --- | --- | --- |
| CPSMR1-327Intron (675 bp)  (Intron a) | TTCAAAATCACTTTTTCTCTCTTAAGCTACACAAGTTTAACTAAAAGCCTAGAACGAACTTTTTATTGGACGCATTAAACTACAATATGAAGTTCTTTGCTGGGCAAACTGTTATGAATGTGCTGCAACATGTTTCCTCTCCCACCACCAATTTAAGGTTTACTACCATGCTGTCTTGTGGGTTTAAGAATTCATCTGGTATCCTGCTTATTAATATGTTGTTTATGTTTTTCTTGTAGGTTGTTATCTTATTGCAATCTTAAAAAGGAAGAGGATGGTAAGATGATGCTGGCTATTAAGGAGCAGAGGCACCGACGGTTGTTGACACTGTCATATGGTGCTATGTGTTTTCAATTCTCAAATTCAGTAGGGGATGAGGGCATAGAAGTGGATGATGATGAGTTGATGTTTGAAATATTTGATGCATTGCTGCGCACAAAGATTTCAAACTCAAAGGGCATGACGCACTTATACAGCTGGATGCGTGGAGTTTATCTCAGCACATTCAAAGTAGAGGTGCAGTGTGATGATTACAACTCAAATCTGCTGGAGAAGGATTTGGCTGGAGAAGCTCAGGGTCTTTCACAGTTCGTTTCAGGACTTGCTGACTGGATTCCCAGTCGTGTAAAGACCTTGGCAGGATATGCCGCTGAGGGCATAATTGAGGCCTTTAAG | AflII, BbvCi |
| CPSMR1-604Intron (675 bp)  (Intron b) | TTCAAAATCACTTTTTCTCTCTTAAGCTACACAAGTTTAACTAAAAGCCTAGAACGAACTTTTTATTGGACGCATTAAACTACAATATGAAGTTCTTTGCTGGGCAAACTGTTATGAATGTGCTGCAACATGTTTCCTCTCCCACCACCAATTTAAGGTTGTTATCTTATTGCAATCTTAAAAAGGAAGAGGATGGTAAGATGATGCTGGCTATTAAGGAGCAGAGGCACCGACGGTTGTTGACACTGTCATATGGTGCTATGTGTTTTCAATTCTCAAATTCAGTAGGGGATGAGGGCATAGAAGTGGATGATGATGAGTTGATGTTTGAAATATTTGATGCATTGCTGCGCACAAAGATTTCAAACTCAAAGGGCATGACGCACTTATACAGCTGGATGCGTGGAGTTTATCTCAGCACATTCAAAGTAGAGGTTTACTACCATGCTGTCTTGTGGGTTTAAGAATTCATCTGGTATCCTGCTTATTAATATGTTGTTTATGTTTTTCTTGTAGGTGCAGTGTGATGATTACAACTCAAATCTGCTGGAGAAGGATTTGGCTGGAGAAGCTCAGGGTCTTTCACAGTTCGTTTCAGGACTTGCTGACTGGATTCCCAGTCGTGTAAAGACCTTGGCAGGATATGCCGCTGAGGGCATAATTGAGGCCTTTAAG | AflII, BbvCi |
| CPSMR1-Tin  (1731 bp)  (Introns #1&2) | ACTGTGGCAAAGGATGGTACTGTACACTGTTGGGCAGAATCTGGGAAGAACTCATTCTAGTTGGTATGAGGGCATCAAGGACAAGTGCATGCTTGCACTATCAAAAGCATACTCAACTGAGATCAAGGATTGGCCTGTAGCACTCAAAATTGTTGTTGGAGTGATACTGGCTACTGTAGCAGGTTTACTACCATGCTGTCTTGTGGGTTTAACAATTCATCTGGTATCCTGCTTATTAATATGTTGTTTATGTTTTTCTTGTAGGTAAGGCATTTTGGAGGTTCTATGCCTCAATGGCAGATGCAGGCAATGGTGGACACTTTGTGGGAGCCGTTGCTTCCGCATTTGCAGGAAGTCAAGCGGTTGTTGCACAGAGTAGGAAGCCCAACAGGTTTGATGTGGCTCAGTACAGGTACCGAAACATACCTCTAAGGAAGAGAAATTGGGCAGAAGGGCAAATGAGTCTGGATCAGTCCACAATGCTCATAATGGAAAAGTGCAAGGCCAATTTCGTCTTTAGCAACATTAGCTGTCAGATAGTTATGTTGCCTGGGCGACAATTCTTGTGCTACAAACATGTGTTTGCTAGTCTCAATAGTCCAATGTATGTGGATATTTATACTGCCAACAAGAAGTATAAACTCTATTACAAACCTCAGAATAGGGTATACTTTGAGACTGATAGTGAGATCATGCTATACAAGGATGCCAGTTTGGAAGACATACCTGCCAGCTGCTGGGATCTTTTTTGTTTTGATGCGGAAAAAAGTCTGCCACGAGGTAGTTTCCCAGCAGAAATCCTCTCGTGCAAACTAGATCGGACAACGAATCAACATATCCCGGAGTGGGCCGACATCTCAGCTCGTACTGTCAATCAAAAACTGGACGTGGAATTTGGGGAGTACCAAACCATCTTTTATTCCTATCTCCAGTATGATGTACCCACAAAAGCTGAAGATTGTGGTTCCCTAATAATAGCAACCATTGATGGTAGGAAAAAGATAATAGGGATCCACACTGCTGGACGGGCAAATAGGAGTGGTTTTGCAAGTTATATGCCGCAGGTAGAAATACCAGTTCAAGCACAAGCAGCGGAAAAGTTCTTTGATTTTCTTGAGAAaGaACAACATGTTACTGAGGGCATTGGAAAGGTGGGAAATCTCAAGAAAGGAGTCTGGGTTCCATTACCCACTAAGACCAATCTTGTGGAAACACCAAAAGAGTGGCATCTGGGCACTGAGAAAACAAAAGAACCAAGTATTCTCAGCAGTACGGATTTAAGGCTCGGTGATAAGCAGTATGATCCCTTTGTTGGAGGAATACAGAAGTACGCCGAACCAATGGGAATTCTAGATGATGAGGTGCTCCGGCATGTGGCAACAGACATAGTTGAAGAATGGTTTGACTGTGTAGACCCTCAAGAAGATACTTTTGAGGAAGTTGACCTGCAGGTTGCTATCAATGGTCTTGAAGGAATGGAATACATGGAAAGAGTTCCTATGGCAACATCTGAAGGCTTCCCACACATTTTGACAAGGAAAAGTGGGGAAAAAGGCAAAGGTTAGTGAAGTTGTACCATTTATTTAGCTTCAAATGAGGGACCAGGCTTTACATTGATAAATTCAACATCTTTCTCTATTGTTGCATGATCAGGTAGGTTTGTATATGGGGATGGAGAAATTTTTGATCTGATCCCGGGTACATCTGTACATGAGGCATATCTGACACTGG | Bsp1407I |
| CPSMR1-TRIN  (1812 bp)  (Introns #1,2,3) | CTGTGGCAAAGGATGGTACTGTACACTGTTGGGCAGAATCTGGGAAGAACTCATTCTAGTTGGTATGAGGGCATCAAGGACAAGTGTATGCTTGCACTATCAAAAGCATACTCAACTGAGATCAAGGATTGGCCTGTAGCACTCAAAATTGTTGTTGGAGTGATACTGGCTACTGTAGCAGGTTTACTACCATGCTGTCTTGTGGGTTTAACAATTCATCTGGTATCCTGCTTATTAATATGTTGTTTATGTTTTTCTTGTAGGTAAGGCATTTTGGAGGTTCTATGCCTCAATGGCAGATGCAGGCAATGGTGGACACTTTGTGGGAGCCGTTGCTTCCGCATTTGCAGGAAGTCAAGCGGTTGTTGCACAGAGTAGGAAGCCCAACAGGTTTGATGTGGCTCAGTACAGATACCGAAACATACCTCTAAGGAAGAGAAATTGGGCAGAAGGGCAAATGAGTCTGGATCAGTCCACAATGCTCATAATGGAAAAGTGCAAGGCCAATTTCGTCTTTAGCAACATTAGCTGTCAGATAGTTATGTTGCCTGGGCGACAATTCTTGTGCTACAAACATGTGTTTGCTAGTCTCAATAGTCCAATGTATGTGGATATTTATACTGCCAACAAGAAGTATAAACTCTATTACAAACCTCAGAATAGGGTATACTTTGAGACTGATAGTGAGATCATGCTATACAAGGATGCCAGTTTGGAAGACATACCTGCCAGCTGCTGGGATCTTTTTTGTTTTGATGCGGAAAAAAGTCTGCCACGAGGTATGTGGATGAGTTCTTGTGTATTTTATCAGGAGATTGTAAATTTAGTGCAATCTTGAATTATCGATTCTATTACTCCACAGGTAGTTTCCCAGCAGAAATCCTCTCGTGCAAACTAGATCGGACAACGAATCAACATATCCCGGAGTGGGCCGACATCTCAGCTCGTACTGTCAATCAAAAACTGGACGTGGAATTTGGGGAGTACCAAACCATCTTTTATTCCTATCTCCAGTATGATGTACCCACAAAAGCTGAAGATTGTGGTTCCCTAATAATAGCAACCATTGATGGTAGGAAAAAGATAATAGGCATCCACACTGCTGGACGGGCAAATAGGAGTGGTTTTGCAAGTTATATGCCGCAGGTAGAAATACCAGTTCAAGCACAAGCAGCGGAAAAGTTCTTTGATTTTCTTGAGAAaGaACAACATGTTACTGAGGGCATTGGAAAGGTGGGAAATCTCAAGAAAGGAGTCTGGGTTCCATTACCCACTAAGACCAATCTTGTGGAAACACCAAAAGAGTGGCATCTGGGCACTGAGAAAACAAAAGAACCAAGTATTCTCAGCAGTACGGATTTAAGGCTCGGTGATAAGCAGTATGATCCCTTTGTTGGAGGAATACAGAAGTACGCCGAACCAATGGGAATACTAGATGATGAGGTGCTCCGGCATGTGGCAACAGACATAGTTGAAGAATGGTTTGACTGTGTAGACCCTCAAGAAGATACTTTTGAGGAAGTTGACCTACAGGTTGCTATCAATGGTCTTGAAGGAATGGAATACATGGAAAGAGTTCCTATGGCAACATCTGAAGGCTTCCCACACATTTTGACAAGGAAAAGTGGGGAAAAAGGCAAAGGTTAGTGAAGTTGTACCATTTATTTAGCTTCAAATGAGGGACCAGGCTTTACATTGATAAATTCAACATCTTTCTCTATTGTTGCATGATCAGGTAGGTTTGTATATGGGGATGGAGAAATTTTTGATCTGATCCCGGGTACATCAGTACATGAGGCATATCTGACACTG | Bsp1407I  (2nd site lost upon inserting gBlock) |
| CPSMR1-QUIN  (953 bp)  (Intron #4) | TGTTTATGCACATGGGGCTTCTAGAGTTGGTAAAACAATGGTGATCAACAGACTCATTGAAGATTTTCGCAAAGAGTTGGAACTTGGAGAGGACTGTGTGTATCCACGAAATGTGGTAGATGACTACTGGAGTGGGTACAAAAGACAACCTATTGTTGTCATTGATGATTTTGGTGCTGTGTCTTCAGATCCTTCTGCAGAAGCTCAATTAATTCCATTGATCTCTAGTGCTCCCTATCCCCTTAACATGGCTGATCTCTCTGAGAAGGGAATGCACTTTGATTCAGCTATCGTCATGTGCTCATCCAATTTCATTGAGTGTTCACCAGAAAGCAAGGTACTTTCTCAAAATCAAAAGAAACTGTAGTGTAACAAATTTCTTCACTTGATGTGATGTATATATATCTTTAGCTATCTAGTGTTCATATATGTAACTCGTTGTTCAAGAACTTCTTTGTGTAATTCATCCGCAGGTGCGTGACGAAATGGCATTCAGAAACAGACGACATGTGCTCTTCACTGTCTCACTTGACCCTAATATACCATATGATGGTGATGATATCACAAAGAATCAAATATATGAAATCAAAACTTGGTTTCATGATTCGTATCATGTTGAAGCAACTTTCACATCATATGGGGACTTGCTGGCATATTGCAAAAACAAGTGGGTGGAGCACAATACTGAGCAAGAGGCCAACTTGAAGCAACTTGGAGTTAAAAAGGAGAGCGTTGCATTTCAGCAGTTTCGTTCCATTCTTGATTTGGCAGTCTTTGTCAATCAAGATGCGGAGAATTTCAAGCAAAGGCTGGAGACGCCAGATGGTAGGTGCCACTTTGTGTCATGTTATGATAAGAGTGGTATACTCAGGCACTATACTATTGATGCAACTGGAGATGTGCAAGAAATGGAAAAGGTTGATTCCTCTCTAGATGACATCCTATTGGAAAAA | XbaI |
| FZVec-ML-NbPDS  (934 bp)  Bold blue: duplicated processing sites;  Dark red: altered to minimize recombination;  Light red: new Eco72I sites;  Simple blue: NbPDS insert | TTTGAAGGGCAACCAGTGCTTAAGAGAATCTCATCTACCAAAGCTATTTTCTCTAAAGGTTCTAGTTTTCGATATATGATTTCTGGCAAAAAAGAGCACAAGATTGACAAGCCAAGGCTAGAAGAAGATGGTAGTAAGAGTTACATTGATGGTTTACAAGATACCTTTGACACGACTCATGCTACTCTGCAA**TCAGGTGCAGACCTGTTTAAGAGGAACCTAGACGATGTCTCGACTATCTCAGATACGATGCACGTG**CAAGGTGTGCCTGATAGGGTGACAGATGAGGTGTTCATTGCCATGTCAAAGGCACTTAACTTCATAAACCCTGACGAGCTTTCGATGCAGTGCATTTTGATTGCTTTGAACAGATTTCTTCAGGAGAAACATGGTTCAAAAATGGCCTTTTTAGATGGTAACCCTCCTGAGAGACTTTGCATGCCGATTGTGGAACATATTGAGTCAAAAGGTGGCCAAGTCAGACTAAACTCACGAATAAAAAAGATCGAGCTGAATGAGGATGGAAGTGTCAAATGTTTTATACTGAATAATGGCAGT**CACGTGACGTTCGATACCACACACGCAACCCTACAG**TCTGGGGCTGATCTATTCAAACGAAATTTGGATGATGTAAGCACCATTTCGGACACCATGCTTGGGGCCATGATTGGACAAACCAAGGTGGTGATTCCAAAAACATTAGTTGCAGGTACAGTTCTCAAAAGTGGACCGCTTTCAGATGTGATGCAGCAGGGATCATTCCGATCAACAATAGCATTGCAAAGAACACATATAATAACTGGAAAAATACATGTTGTTGCGATGCTTGAAACTGCTGTAAATACAGGACTGGGATTGGCCATTTGTTTCAATAGTGGCATTCGAGGAAAAGCTTCTGCAGACATCTATGC**A**ACGTGTTCACAAGATGCCATGA | AflII, Eco72I (lost upon inserting gBlock) |
